# Supplementary material for: Spiders did not repeatedly gain, but repeatedly lost, foraging webs
Source: PeerJ journal article supplement (doi:10.7717/peerj.6703), 2019-04-04

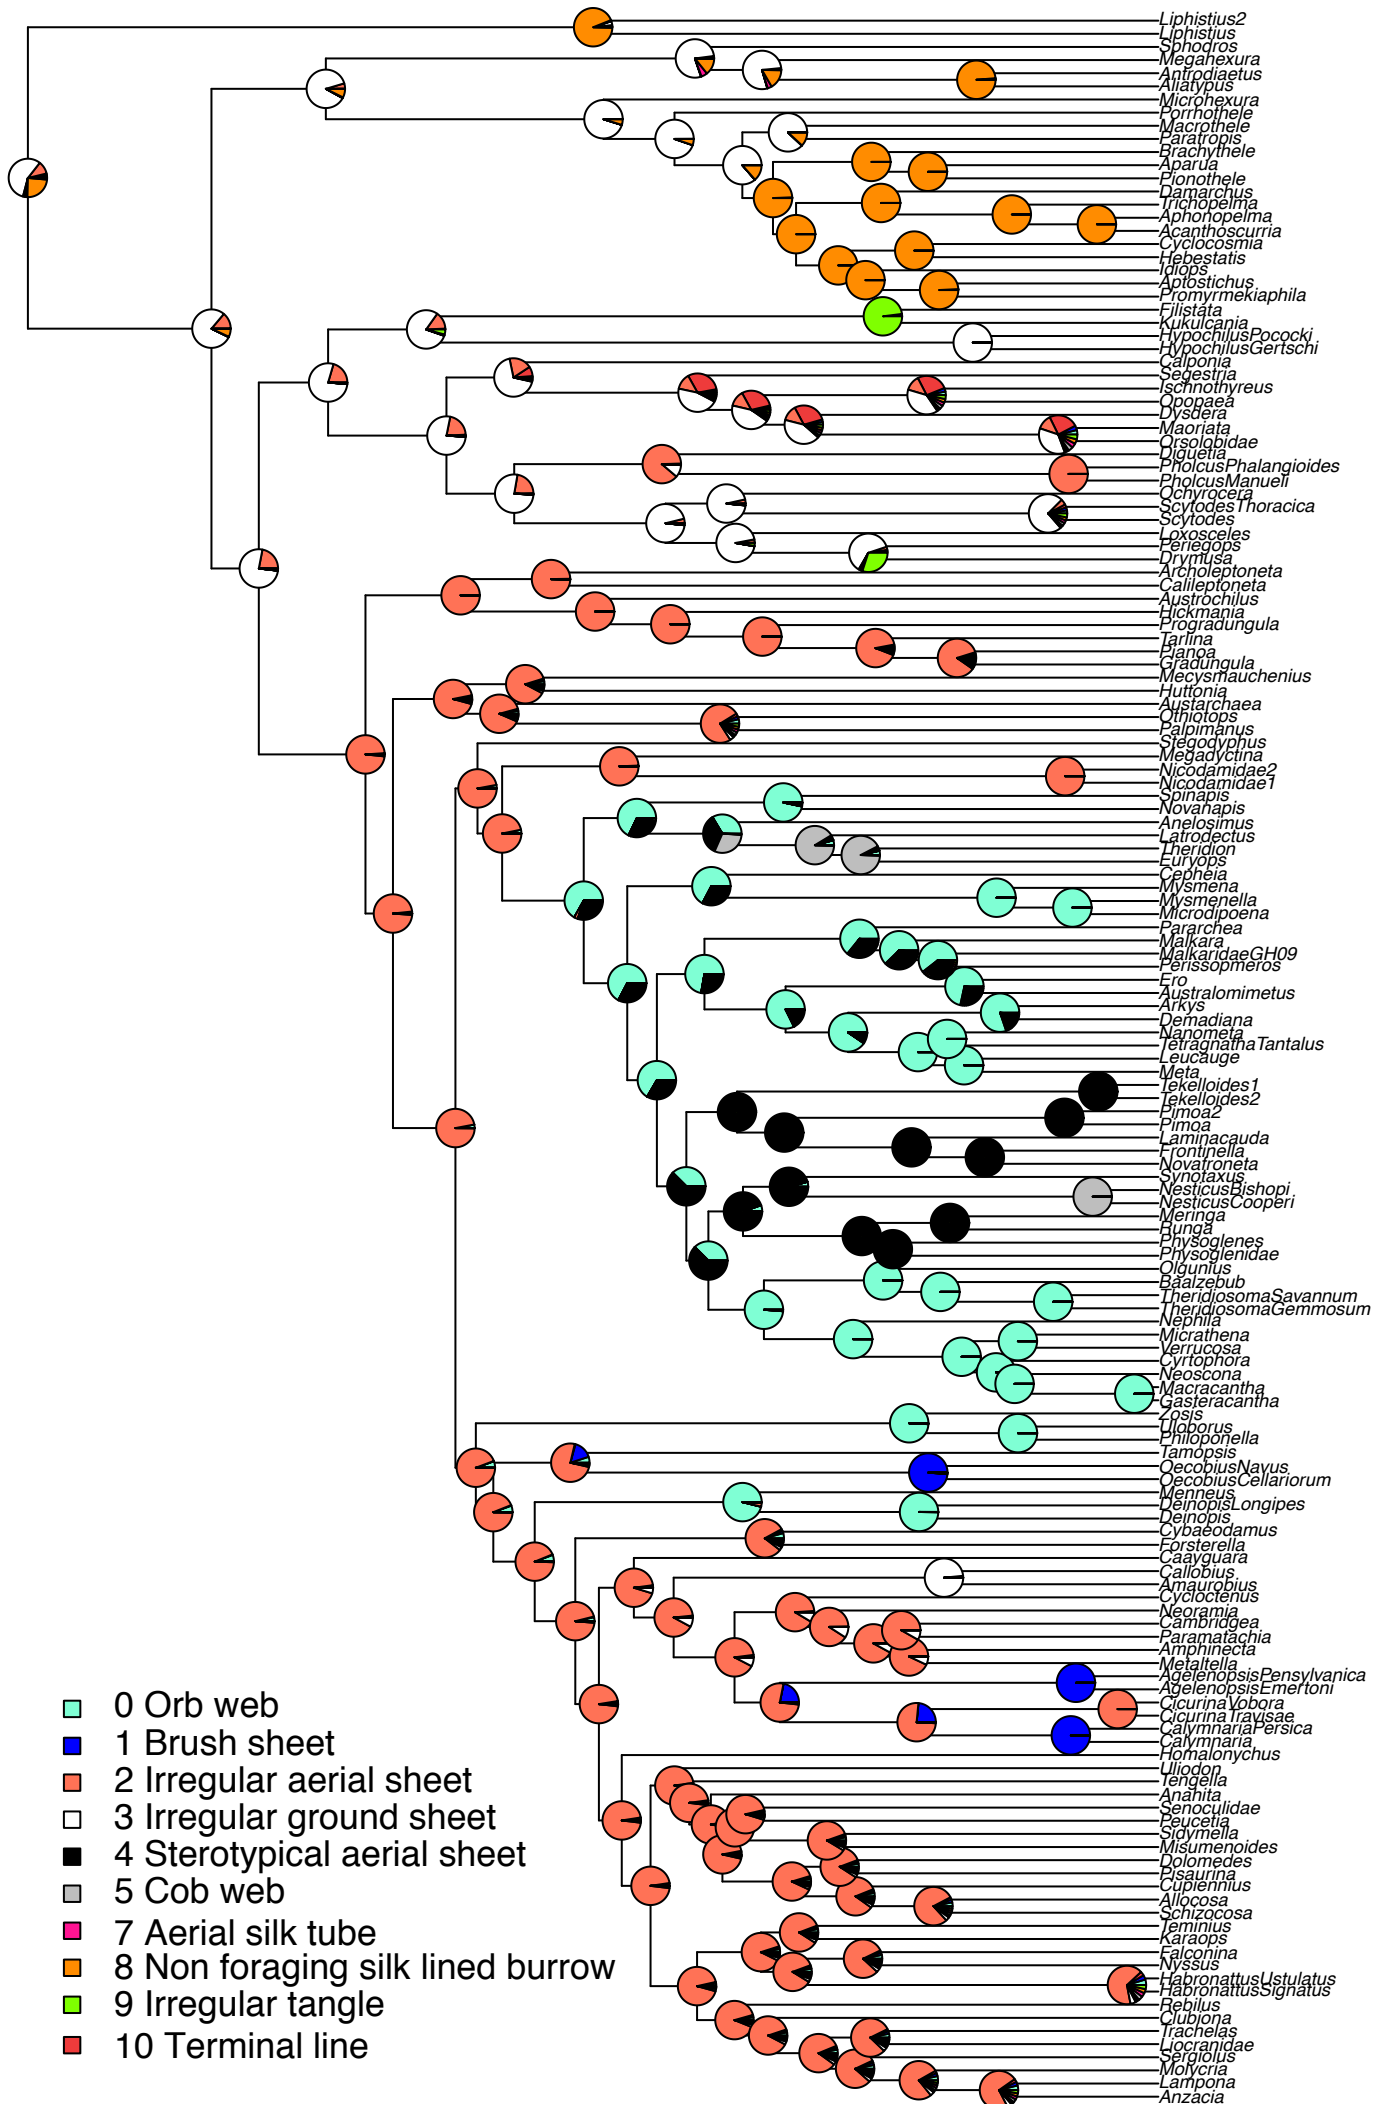

Supplement: FigureS5.pdf [file FigureS5.pdf]
