# Supplementary material for: Spiders did not repeatedly gain, but repeatedly lost, foraging webs
Source: PubMed Central journal article supplement (PMC6451839; doi:10.7717/peerj.6703), 2019-04-04

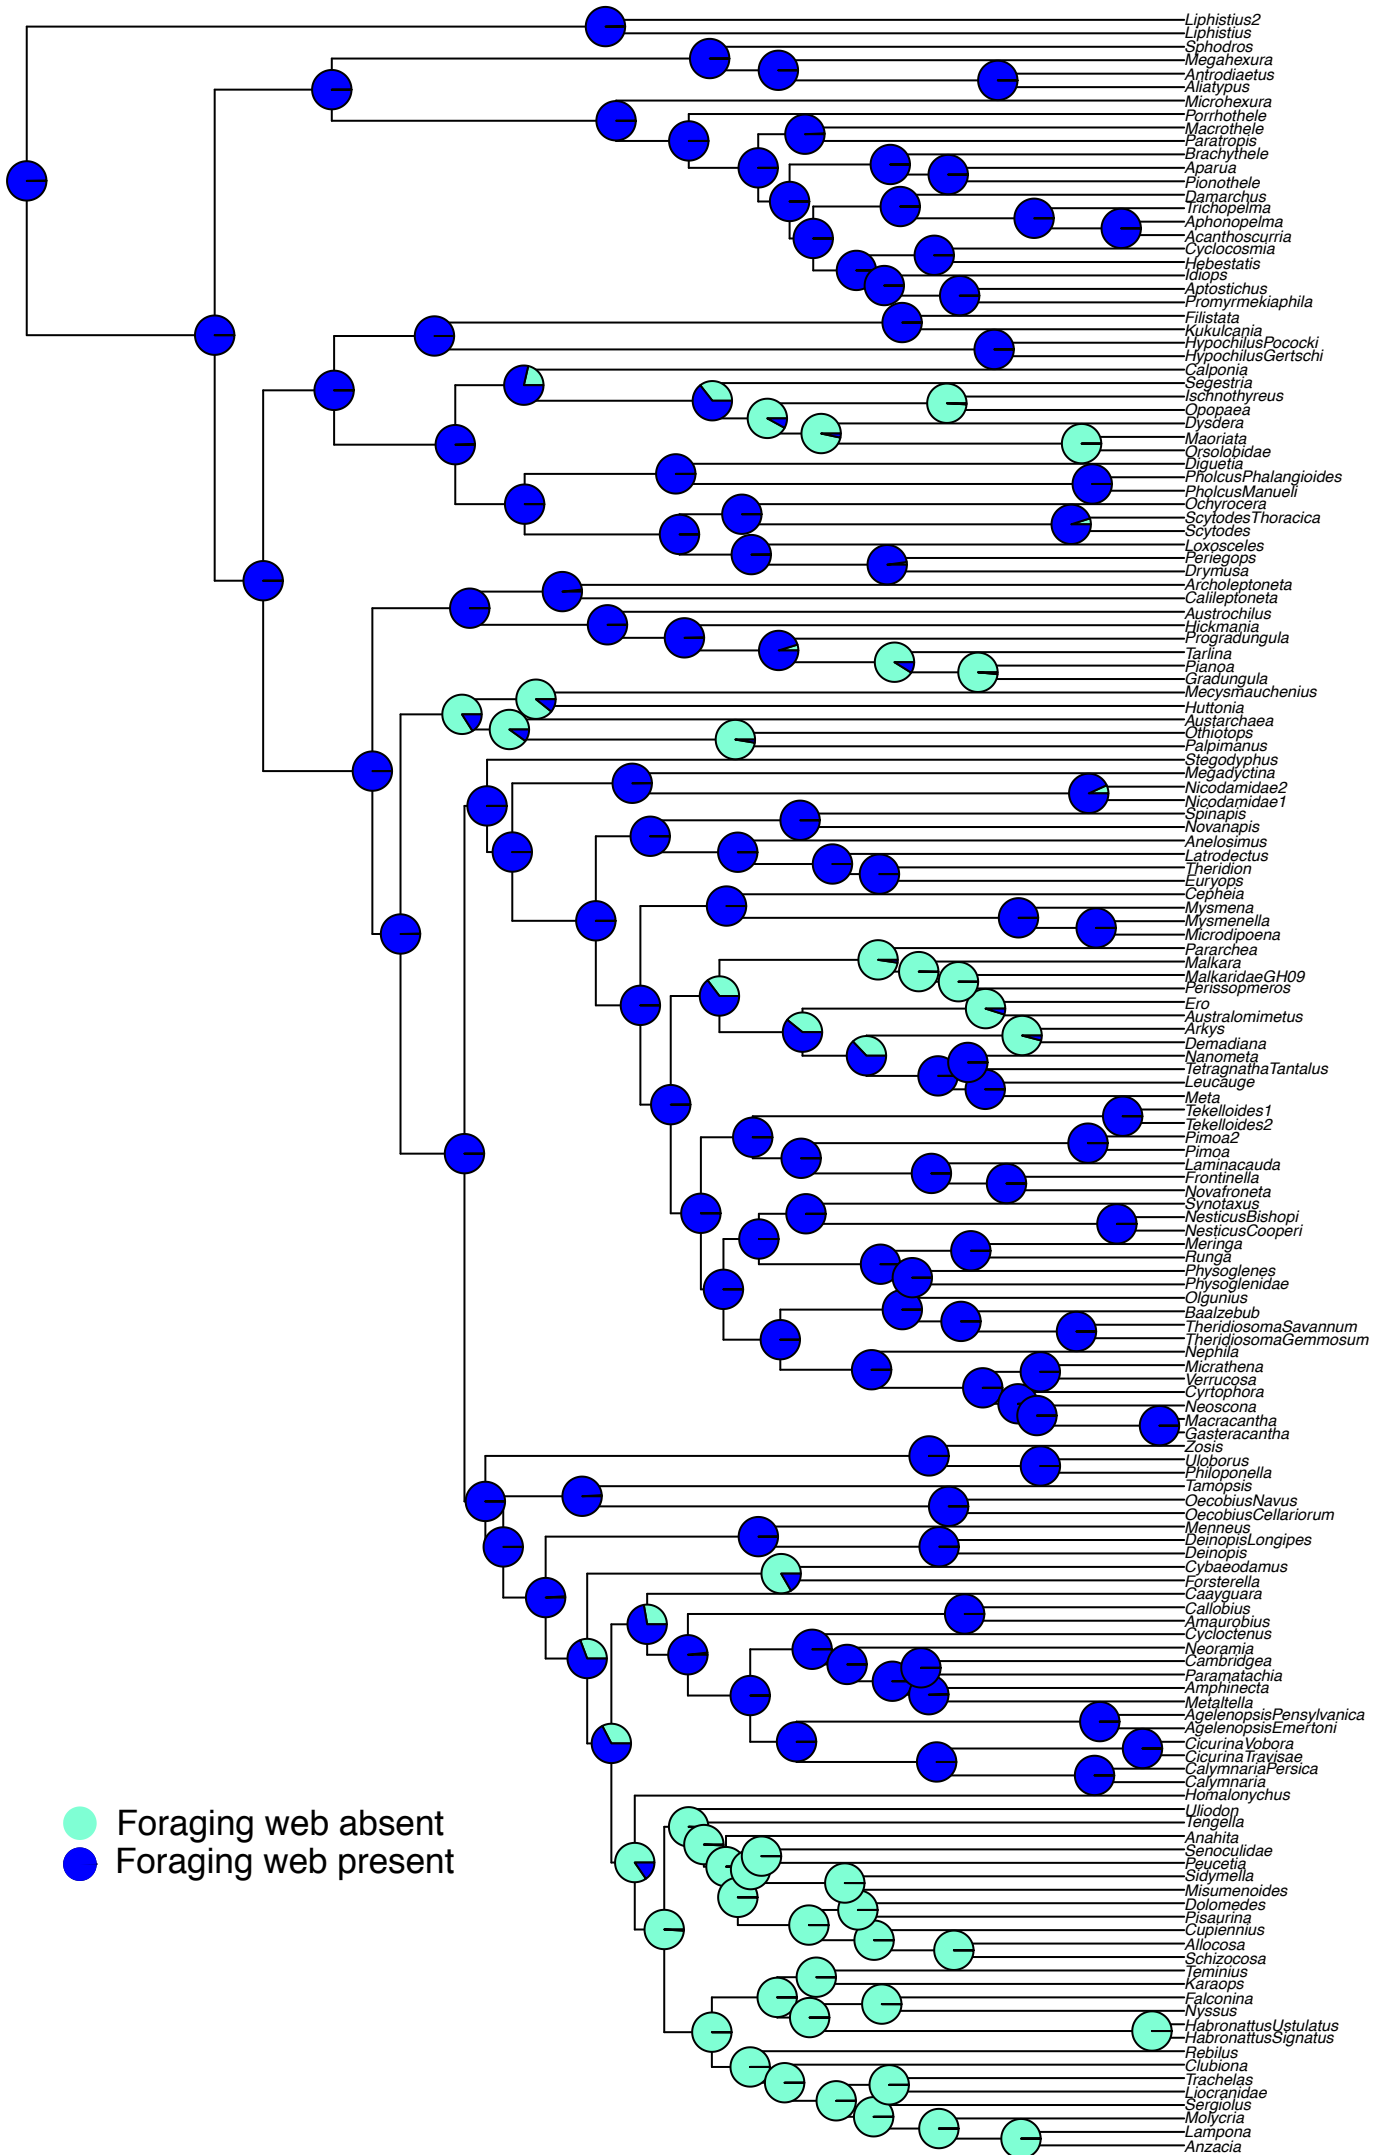

Supplement: peerj-07-6703-s002.pdf [file peerj-07-6703-s002.pdf]
